# Supplementary material for: Perspectives from Dentists, Dental Assistants, Students, and Patients on Dental Care Adapted to the COVID-19 Pandemic: A Cross-Sectional Survey
Source: Int J Environ Res Public Health. 2021 Apr 9;18(8):3940. doi: 10.3390/ijerph18083940 (PMC8069116; doi:10.3390/ijerph18083940)
Supplement: Supplementary file 1 [file ijerph-18-03940-s001.zip]

Archive with 4 entries (4 files):
- Questionnaire dental assistants.pdf
- Questionnaire dentists.pdf
- Questionnaire patients.pdf
- Questionnaire students.pdf
