# Supplementary material for: Perspectives from Dentists, Dental Assistants, Students, and Patients on Dental Care Adapted to the COVID-19 Pandemic: A Cross-Sectional Survey
Source: Int J Environ Res Public Health. 2021 Apr 9;18(8):3940. doi: 10.3390/ijerph18083940 (PMC8069116; doi:10.3390/ijerph18083940)
Supplement: Supplementary file 1 [file ijerph-18-03940-s001.zip › Questionnaire dental assistants.pdf]

A1 I felt sufficiently informed about the dental care concept adapted to COVID-19 pandemic, by...

Please select the appropriate answer for each point:

|                                                                                                                          | strongly<br>disagree  | disagree              | neutral               | agree                 | strongly<br>agree     | no<br>answer          |
|--------------------------------------------------------------------------------------------------------------------------|-----------------------|-----------------------|-----------------------|-----------------------|-----------------------|-----------------------|
| information signs                                                                                                        | <input type="radio"/> |
| internal department information<br>(e.g. meetings, student council,<br>online, personal information<br>transfer meeting) | <input type="radio"/> |
| external department information<br>(e.g. university newsletter,<br>webpage)                                              | <input type="radio"/> |

A2: Please assess whether and to what extent patient care in the dental clinic SINCE the COVID-19 pandemic with regard to the following aspects has changed compared to before the pandemic:

|                                                                 | less                  | unchanged             | more                  |
|-----------------------------------------------------------------|-----------------------|-----------------------|-----------------------|
| time required for<br>patient registration                       | <input type="radio"/> | <input type="radio"/> | <input type="radio"/> |
| time required for<br>patient organisation<br>in the departments | <input type="radio"/> | <input type="radio"/> | <input type="radio"/> |
| time required for<br>treatments                                 | <input type="radio"/> | <input type="radio"/> | <input type="radio"/> |
| time required for<br>individual<br>treatment sessions           | <input type="radio"/> | <input type="radio"/> | <input type="radio"/> |
| time required for<br>desinfection                               | <input type="radio"/> | <input type="radio"/> | <input type="radio"/> |

B1: To what extent do the following statements apply to you about current patient care during the COVID-19 pandemic?

Please select the appropriate answer for each point:

|                                                                                                                                                                  | strongly<br>disagree  | disagree              | neutral               | agree                 | strongly<br>agree     | no answer             |
|------------------------------------------------------------------------------------------------------------------------------------------------------------------|-----------------------|-----------------------|-----------------------|-----------------------|-----------------------|-----------------------|
| I think it's good that regular patient care is provided with increased hygienic and protective measures and not just emergency and not just emergency treatment. | <input type="radio"/> |
| I am afraid to infect MYSELF.                                                                                                                                    | <input type="radio"/> |
| I am afraid to infect OTHERS.                                                                                                                                    |                       |                       |                       |                       |                       |                       |
| In my opinion, the patients feel uncomfortable.                                                                                                                  | <input type="radio"/> |
| I feel uncomfortable.                                                                                                                                            | <input type="radio"/> |

B2. How useful do you think are the following measures with regard to protection against infection in the dental clinic/dental treatment?

|                                                                                              | strongly<br>disagree  | disagree              | neutral               | agree                 | strongly<br>agree     | no answer             |
|----------------------------------------------------------------------------------------------|-----------------------|-----------------------|-----------------------|-----------------------|-----------------------|-----------------------|
| questionnaire to query<br>symptoms and stay in<br>risk areas                                 | <input type="radio"/> |
| one-way street and<br>entry system                                                           |                       |                       |                       |                       |                       |                       |
| wearing mouth-to-<br>nose coverings<br>throughout the whole<br>attendance                    | <input type="radio"/> |
| corona test before<br>each treatment                                                         | <input type="radio"/> |
| additional protective<br>equipment (visors,<br>FFP2/N95 masks etc.)<br>on the treatment side | <input type="radio"/> |
| additional hand<br>hygiene                                                                   |                       |                       |                       |                       |                       |                       |

B3. Which of the following aspects affect you?

|                                                                                                                            | strongly<br>disagree  | disagree              | neutral               | agree                 | strongly<br>agree     | no<br>answer          |
|----------------------------------------------------------------------------------------------------------------------------|-----------------------|-----------------------|-----------------------|-----------------------|-----------------------|-----------------------|
| limited communication due<br>to additional protective<br>equipment (e.g. visor,<br>mask)                                   | <input type="radio"/> |
| longer waiting time until<br>the start of treatment<br>session due to additional<br>measures (e.g. COVID<br>questionnaire) | <input type="radio"/> |
| lack of facial expression<br>due to additional protective<br>equipment (e.g. visor,<br>mask)                               | <input type="radio"/> |

B4. Were you at least at one time afraid of being infected with COVID-19 at the dental clinic?

- ☐ Yes
- ☐ No

B5. Please indicate for each month how much fear you had of infection with COVID-19 at the dental clinic.

|     | large<br>fear         | rather<br>fear        | undecided             | rather no<br>fear     | none<br>fear          |
|-----|-----------------------|-----------------------|-----------------------|-----------------------|-----------------------|
| mar | <input type="radio"/> |
| apr | <input type="radio"/> |
| may | <input type="radio"/> |
| jun | <input type="radio"/> |
| jul | <input type="radio"/> |
| aug | <input type="radio"/> |
| sep | <input type="radio"/> |
| oct | <input type="radio"/> |
| nov | <input type="radio"/> |
| dec | <input type="radio"/> |

B6. Do you think, that all hygiene rules related to infection control were followed in the COVID-19 pandemic in the following areas?

|                              | never                 | sometimes             | often                 | more often            | always                |
|------------------------------|-----------------------|-----------------------|-----------------------|-----------------------|-----------------------|
| patient registration         | <input type="radio"/> |
| waiting rooms                | <input type="radio"/> |
| treatment /dentists'<br>room | <input type="radio"/> |

B7. Do you perceive the increased hygiene rules and additional protective measures (e.g., wearing mouth/nose covering in the building, hand hygiene, keeping your distance, regular ventilation) as a burden during your stay at the dental clinic?

- ☐ Yes, the measures are a burden for me.
- ☐ No, the additional measures are not a problem for me.
- ☐ Other

C1. For how long (month/s) do you think the COVID-19 pandemic will continue to change our patient care in the dental clinic?

C2. Would you advocate that the additional protective measures should also be maintained after the COVID-19 pandemic with regard to other airborne infectious diseases (e.g., tuberculosis)?

- |                                                                                                 |                       |
|-------------------------------------------------------------------------------------------------|-----------------------|
| Yes, always.                                                                                    | <input type="radio"/> |
| Yes, depending on the situation (e.g. in the winter months or when there is an increased risk). | <input type="radio"/> |
| I cannot judge.                                                                                 | <input type="radio"/> |
| no                                                                                              | <input type="radio"/> |

C3. What additional hygiene and protective measures would you recommend? (Multiple selection possible)

- |                                                         |                       |
|---------------------------------------------------------|-----------------------|
| questionnaire to query symptoms and stay in risk areas. | <input type="radio"/> |
| one-way street system and entry system                  | <input type="radio"/> |
| wearing face coverings throughout the whole attendance  | <input type="radio"/> |
| corona test before each treatment                       | <input type="radio"/> |

- additional protective equipment  
(visors, FFP2 masks, etc.) on the  
treatment side ☐
- structural partitioning of the treatment  
boxes into individual "treatment  
rooms" ☐
- additional hand hygiene ☐
- others ☐

D1. What is your gender?

Please select only one of the following answers:

- ☐ male
- ☐ female
- ☐ inter / trans

D2. What age group do you belong to?

- 0- to 4-year-olds ☐
- 5- to 14-year-olds ☐
- 15- to 24-year-olds ☐
- 25- to 34-year-olds ☐
- 35- to 44-year-olds ☐
- 45 to 54-year-olds ☐
- 55- to 64-year-olds ☐
- 65- to 74-year-olds ☐
- 75 to 100-year-olds ☐

D3. In which area(s) are you predominantly active?

- organisation (administrative tasks) ☐
- instrument preparation ☐
- patient treatment ☐
- patient admission ☐
- other ☐

D4. Do you belong to the risk group with regard to a possible COVID-19 infection?

- ☐ Yes
- ☐ No

D5. Why do you belong to the risk group? (Multiple selection possible)

- age +50 years ☐
- chronic disease (e.g. diabetes, high blood pressure, heart, lung, liver or kidney disease) ☐
- smoker ☐
- immunosuppression ☐
- overweight ☐
- pregnancy ☐
- others ☐

D6. Have you ever been diagnosed with COVID-19?

- ☐ Yes
- ☐ No

D7: Where do you think you became infected with COVID-19?

- in private environment (at home) ☐
- in private environment (vacation) ☐
- in professional environment (dental clinic) ☐
- in professional environment (dental praxis) ☐
- in professional environment (medical appointment) ☐
- in professional environment (stay in hospital ) ☐
- others ☐
