# Supplementary material for: Perspectives from Dentists, Dental Assistants, Students, and Patients on Dental Care Adapted to the COVID-19 Pandemic: A Cross-Sectional Survey
Source: Int J Environ Res Public Health. 2021 Apr 9;18(8):3940. doi: 10.3390/ijerph18083940 (PMC8069116; doi:10.3390/ijerph18083940)
Supplement: Supplementary file 1 [file ijerph-18-03940-s001.zip › Questionnaire dentists.pdf]

A1 I felt sufficiently informed about the dental care concept adapted to COVID-19 pandemic, by...

Please select the appropriate answer for each point:

|                                                                                                                          | strongly<br>disagree  | disagree              | neutral               | agree                 | strongly<br>agree     | no<br>answer          |
|--------------------------------------------------------------------------------------------------------------------------|-----------------------|-----------------------|-----------------------|-----------------------|-----------------------|-----------------------|
| information signs                                                                                                        | <input type="radio"/> |
| internal department information<br>(e.g. meetings, student council,<br>online, personal information<br>transfer meeting) | <input type="radio"/> |
| external department information<br>(e.g. university newsletter,<br>webpage)                                              | <input type="radio"/> |

A2: Please assess whether and to what extent patient care in the dental clinic SINCE the COVID-19 pandemic with regard to the following aspects has changed compared to before the pandemic:

|                                                                 | less                  | unchanged             | more                  |
|-----------------------------------------------------------------|-----------------------|-----------------------|-----------------------|
| time required for<br>students<br>organisation                   | <input type="radio"/> | <input type="radio"/> | <input type="radio"/> |
| time required for<br>patient organisation<br>in the departments | <input type="radio"/> | <input type="radio"/> | <input type="radio"/> |
| time required for<br>treatments                                 | <input type="radio"/> | <input type="radio"/> | <input type="radio"/> |
| time required for<br>individual<br>treatment sessions           | <input type="radio"/> | <input type="radio"/> | <input type="radio"/> |

B1 To what extent do the following statements apply to you about current patient care during the COVID-19 pandemic?

Please select the appropriate answer for each point:

|                                                                                                                                                             | strongly<br>disagree  | disagree              | neutral               | agree                 | strongly<br>agree     | no answer             |
|-------------------------------------------------------------------------------------------------------------------------------------------------------------|-----------------------|-----------------------|-----------------------|-----------------------|-----------------------|-----------------------|
| I think it is good that regular patient treatment is maintained with increased hygiene and protective measures and not only emergency treatment is provided | <input type="radio"/> |
| I am afraid to infect MYSELF.                                                                                                                               | <input type="radio"/> |
| I am afraid to infect OTHERS.                                                                                                                               | <input type="radio"/> |
| In my opinion, the patients feel uncomfortable.                                                                                                             | <input type="radio"/> |
| I feel uncomfortable.                                                                                                                                       | <input type="radio"/> |

B2. How useful do you think are the following measures with regard to protection against infection in the dental clinic/dental treatment?

|                                                                                              | strongly<br>disagree  | disagree              | neutral               | agree                 | strongly<br>agree     | no answer             |
|----------------------------------------------------------------------------------------------|-----------------------|-----------------------|-----------------------|-----------------------|-----------------------|-----------------------|
| questionnaire to query<br>symptoms and stay in<br>risk areas                                 | <input type="radio"/> |
| one-way street and<br>entry system                                                           |                       |                       |                       |                       |                       |                       |
| wearing mouth-to-<br>nose coverings<br>throughout the whole<br>attendance                    | <input type="radio"/> |
| corona test before<br>each treatment                                                         | <input type="radio"/> |
| additional protective<br>equipment (visors,<br>FFP2/N95 masks etc.)<br>on the treatment side | <input type="radio"/> |
| additional hand<br>hygiene                                                                   |                       |                       |                       |                       |                       |                       |

B3. Which of the following aspects affect you?

|                                                                                                                            | strongly<br>disagree  | disagree              | neutral               | agree                 | strongly<br>agree     | no<br>answer          |
|----------------------------------------------------------------------------------------------------------------------------|-----------------------|-----------------------|-----------------------|-----------------------|-----------------------|-----------------------|
| limited communication due<br>to additional protective<br>equipment (e.g. visor,<br>mask)                                   | <input type="radio"/> |
| longer waiting time until<br>the start of treatment<br>session due to additional<br>measures (e.g. COVID<br>questionnaire) | <input type="radio"/> |
| lack of facial expression<br>due to additional protective<br>equipment (e.g. visor,<br>mask)                               | <input type="radio"/> |

B4. Were you at least at one time afraid of being infected with COVID-19 at the dental clinic?

- ☐ Yes
- ☐ No

B5. Please indicate for each month how much fear you had of contracting COVID-19 at the dental clinic.

|     | Large<br>fear         | rather<br>fear        | undecided             | rather no<br>fear     | none<br>fear          |
|-----|-----------------------|-----------------------|-----------------------|-----------------------|-----------------------|
| mar | <input type="radio"/> |
| apr | <input type="radio"/> |
| may | <input type="radio"/> |
| jun | <input type="radio"/> |
| jul | <input type="radio"/> |
| aug | <input type="radio"/> |
| sep | <input type="radio"/> |
| oct | <input type="radio"/> |
| nov | <input type="radio"/> |
| dec | <input type="radio"/> |

B6. Do you think, that all hygiene rules related to infection control were followed in the COVID-19 pandemic in the following areas?

|                              | never                 | sometimes             | often                 | More<br>often         | always                |
|------------------------------|-----------------------|-----------------------|-----------------------|-----------------------|-----------------------|
| patient registration         | <input type="radio"/> |
| waiting rooms                | <input type="radio"/> |
| treatment /Dentists'<br>room | <input type="radio"/> |

B7. Do you perceive the increased hygiene rules and additional protective measures (e.g., wearing mouth/nose covering in the building, hand hygiene, keeping your distance, regular ventilation) as a burden during your stay at the dental clinic?

- ☐ Yes, the measures are a burden for me.
- ☐ No, the additional measures are not a problem for me.
- ☐ Others

C1. For how long (month/s) do you think the COVID-19 pandemic will continue to change our patient care in the dental clinic?

C2. Would you be in favor of maintaining the additional protective measures after the COVID-19 pandemic with regard to other airborne infectious diseases (e.g. tuberculosis)?

Yes, always. ☐

Yes, depending on the situation (e.g. in the winter months or when there is an increased risk). ☐

I cannot judge ☐

no ☐

C3. What additional hygiene and protective measures would you recommend? (Multiple selection possible)

questionnaire to query symptoms and stay in risk areas. ☐

one-way street system and entry system ☐

wearing face coverings throughout the whole attendance ☐

- Corona test before each treatment ☐
- additional protective equipment  
(visors, FFP2 masks, etc.) on the  
practioner's side ☐
- structural partitioning of the treatment  
boxes into individual "treatment  
rooms" ☐
- additional hand hygiene ☐
- others ☐

D1. What is your gender?

Please select only one of the following answers:

- ☐ male
- ☐ female
- ☐ inter / trans
- ☐

D2. What age group do you belong to?

- 0- to 4-year-olds ☐
- 5- to 14-year-olds ☐
- 15- to 24-year-olds ☐
- 25- to 34-year-olds ☐
- 35- to 44-year-olds ☐
- 45 to 54-year-olds ☐
- 55- to 64-year-olds ☐
- 65- to 74-year-olds ☐
- 75 to 100-year-olds ☐

D3. In which area(s) are you predominantly active?

- organization (administrative tasks) ☐
- patient admission (e.g., outpatient clinic/poli) ☐
- patient treatment in the room/op ☐
- teaching with patient treatment (e.g. course supervision) ☐
- teaching without patient treatment (e.g. lecture, phantom classes) ☐
- science with patient contact ☐
- science without patient contact ☐
- others ☐

D4. Do you belong to the risk group with regard to a possible COVID-19 infection?

- ☐ Yes
- ☐ No

D5. Why do you belong to the risk group? (Multiple selection possible)

- Age +50 years ☐
- chronic disease (e.g. diabetes, high blood pressure, heart, lung, liver or kidney disease) ☐
- smoker ☐
- immunosuppression ☐
- overweight ☐
- pregnancy ☐

others ☐

D6. Have you ever been diagnosed with COVID-19?

- ☐ Yes
- ☐ No

D7: Where do you think you became infected with COVID-19?

in private environment (at home) ☐

in private environment (vacation) ☐

in professional environment (dental  
clinic) ☐

in professional environment (dental  
praxis) ☐

in professional environment (medical  
appointment) ☐

in professional environment (stay in  
hospital ) ☐

others ☐
