# Supplementary material for: Perspectives from Dentists, Dental Assistants, Students, and Patients on Dental Care Adapted to the COVID-19 Pandemic: A Cross-Sectional Survey
Source: Int J Environ Res Public Health. 2021 Apr 9;18(8):3940. doi: 10.3390/ijerph18083940 (PMC8069116; doi:10.3390/ijerph18083940)
Supplement: Supplementary file 1 [file ijerph-18-03940-s001.zip › Questionnaire patients.pdf]

A1 Please select, if you are a patient yourself or if your child is being treated by us.

- I am a patient myself.
- My child is a patient.

B1 I felt sufficiently informed about the dental care concept adapted to COVID-19 pandemic, by...

Please select the appropriate answer for each point:

|                                                                                                                         | strongly<br>disagree  | disagree              | neutral               | agree                 | strongly<br>agree     | no<br>answer          |
|-------------------------------------------------------------------------------------------------------------------------|-----------------------|-----------------------|-----------------------|-----------------------|-----------------------|-----------------------|
| information signs                                                                                                       | <input type="radio"/> |
| internal information of the<br>department (e.g. meetings, student<br>council, online, personal<br>information transfer) | <input type="radio"/> |
| external information of the<br>department (e.g. university<br>newsletter, webpage)                                      | <input type="radio"/> |

B2. Please assess whether and to what extent patient care in the dental clinic SINCE the COVID-19 pandemic with respect to the following aspects has changed compared to before the pandemic:

|                                                                                                             | less                  | unchanged             | more                  |
|-------------------------------------------------------------------------------------------------------------|-----------------------|-----------------------|-----------------------|
| time required for<br>central patient<br>registration on the<br>first floor (incl.<br>Covid-19<br>anamnesis) | <input type="radio"/> | <input type="radio"/> | <input type="radio"/> |
| time required for<br>patient registration<br>in the departments                                             | <input type="radio"/> | <input type="radio"/> | <input type="radio"/> |

|                                                      | less                  | unchanged             | more                  |
|------------------------------------------------------|-----------------------|-----------------------|-----------------------|
| waiting time in the waiting rooms of the departments | <input type="radio"/> | <input type="radio"/> | <input type="radio"/> |
| waiting time for treatment appointments in general   | <input type="radio"/> | <input type="radio"/> | <input type="radio"/> |
| time required for individual treatment sessions      | <input type="radio"/> | <input type="radio"/> | <input type="radio"/> |

B3. Has your child or yourself had dental treatment postponed due to the COVID-19 pandemic?

- ☐ Yes
- ☐ No

B4. From which side was the above-mentioned appointment postponed?

- ☐ Patient (by yourself)
- ☐ Dental clinic

B5. Why did you postpone the appointment? (Multiple selection possible)

|                                                                                                        |                       |
|--------------------------------------------------------------------------------------------------------|-----------------------|
| concern about possible infection with COVID-19 in dental clinic                                        | <input type="radio"/> |
| family/friends have advised against a visit to the dental clinic due to an increased risk of infection | <input type="radio"/> |
| family doctor advised against visiting dental clinic because patient belongs to risk group             | <input type="radio"/> |
| others                                                                                                 | <input type="radio"/> |

B6. What type of appointment was this? (multiple selection possible)

preventive dental appointment/dental  
check-up ☐

prophylaxis/professional tooth cleaning  
(also as part of supportive periodontal  
therapy) ☐

oral surgical treatment (e.g. tooth  
extraction, implantation) ☐

caries therapy, filling therapy, root  
canal treatment ☐

---

---

orthodontic treatment ☐

---

---

periodontal treatment ☐

---

---

oral surgery treatment (e.g. tumor  
treatment) ☐

---

---

others ☐

Was the appointment cancelled without replacement, or if not, by how many weeks?

- ☐ cancelled without replacement
- ☐ .....weeks was the appointment postponed?

C1. To what extent do the following statements apply to you about current patient care during the COVID-19 pandemic?

Please select the appropriate answer for each point:

|                                                                                                                                                              | strongly<br>disagree  | disagree              | neutral               | agree                 | strongly<br>agree     | No answer             |
|--------------------------------------------------------------------------------------------------------------------------------------------------------------|-----------------------|-----------------------|-----------------------|-----------------------|-----------------------|-----------------------|
| I think it is good that regular patient treatment is maintained with increased hygiene and protective measures and not only emergency treatment is provided. | <input type="radio"/> |
| I am afraid to infect MYSELF.                                                                                                                                | <input type="radio"/> |
| I am afraid to infect OTHERS.                                                                                                                                | <input type="radio"/> |
| I feel uncomfortable.                                                                                                                                        | <input type="radio"/> |
| In my opinion, the practitioner feel uncomfortable                                                                                                           | <input type="radio"/> |

C2. How useful do you think are the following measures with regard to protection against infection in the dental clinic/dental treatment?

|                                                                 | strongly<br>disagree  | disagree              | neutral               | agree                 | strongly<br>agree     | no answer             |
|-----------------------------------------------------------------|-----------------------|-----------------------|-----------------------|-----------------------|-----------------------|-----------------------|
| questionnaire to query symptoms and stay in risk areas          | <input type="radio"/> |
| wearing mouth-to-nose coverings throughout the whole attendance | <input type="radio"/> |

|                                                                                 | strongly disagree     | disagree              | neutral               | agree                 | strongly agree        | no answer             |
|---------------------------------------------------------------------------------|-----------------------|-----------------------|-----------------------|-----------------------|-----------------------|-----------------------|
| corona test before each treatment                                               | <input type="radio"/> |
| additional protective equipment (visors, FFP2 masks etc.) on the treatment side | <input type="radio"/> |
| additional hand hygiene                                                         |                       |                       |                       |                       |                       |                       |

C3. Which of the following aspects affect you?

|                                                                                                          | strongly disagree     | disagree              | neutral               | agree                 | strongly agree        | no answer             |
|----------------------------------------------------------------------------------------------------------|-----------------------|-----------------------|-----------------------|-----------------------|-----------------------|-----------------------|
| limited communication due to additional protective equipment (e.g. visor, mask) on the practioners' side | <input type="radio"/> |
| longer waiting time due to additional measures                                                           | <input type="radio"/> |
| COVID questionnaire                                                                                      | <input type="radio"/> |
| lack of facial expression due to additional protective equipment (e.g. visor, mask)                      | <input type="radio"/> |
| waiting time in the outside area of the dental clinic                                                    | <input type="radio"/> |
| no toys/books in the waiting area                                                                        | <input type="radio"/> |

C4. Were you at least at one time afraid of being infected with COVID-19 at the dental clinic?

- Yes
- No

C5. Please indicate for each month how much fear you had of contracting COVID-19 at the dental clinic.

|     | Large<br>fear         | rather<br>fear        | undecided             | rather no<br>fear     | none<br>fear          |
|-----|-----------------------|-----------------------|-----------------------|-----------------------|-----------------------|
| mar | <input type="radio"/> |
| apr | <input type="radio"/> |
| may | <input type="radio"/> |
| jun | <input type="radio"/> |
| jul | <input type="radio"/> |
| aug | <input type="radio"/> |
| sep | <input type="radio"/> |
| oct | <input type="radio"/> |
| nov | <input type="radio"/> |
| dec | <input type="radio"/> |

C6. Do you think, that all hygiene rules related to infection control were followed in the COVID-19 pandemic in the following areas?

|                              | never                 | sometimes             | often                 | more often            | always                |
|------------------------------|-----------------------|-----------------------|-----------------------|-----------------------|-----------------------|
| patient registration         | <input type="radio"/> |
| waiting rooms                | <input type="radio"/> |
| treatment /dentists'<br>room | <input type="radio"/> |

C7. Do you perceive the increased hygiene rules and additional protective measures (e.g., wearing mouth/nose covering in the building, hand hygiene, keeping your distance, regular ventilation) as a burden during your visit to the dentist?

- ☐ Yes, the measures are a burden for me.
- ☐ No, the additional measures are not a problem for me.
- ☐ Other

D1. For how long (month/s) do you think the COVID-19 pandemic will continue to change our patient care in the dental clinic?

D2. Would you advocate that the additional protective measures should also be maintained after the COVID-19 pandemic with regard to other airborne infectious diseases (e.g., tuberculosis)?

- |                                                                                                 |                       |
|-------------------------------------------------------------------------------------------------|-----------------------|
| Yes, always.                                                                                    | <input type="radio"/> |
| Yes, depending on the situation (e.g. in the winter months or when there is an increased risk). | <input type="radio"/> |
| cannot judge                                                                                    | <input type="radio"/> |
| no                                                                                              | <input type="radio"/> |

D3. What additional hygiene and protective measures would you recommend? (Multiple selection possible)

- |                                                                 |                       |
|-----------------------------------------------------------------|-----------------------|
| questionnaire to query symptoms and stay in risk areas.         | <input type="radio"/> |
| one-way street system and entry system                          | <input type="radio"/> |
| wearing of mouth-nose coverings throughout the whole attendance | <input type="radio"/> |
| corona test before each treatment                               | <input type="radio"/> |

- additional protective equipment  
(visors, FFP2 masks, etc.) on the  
treatment side ☐
- Structural partitioning of the treatment  
boxes into individual "treatment  
rooms" ☐
- additional hand hygiene ☐
- others ☐

E1. What is your gender or the gender of your child?

Please select only one of the following answers:

- ☐ male
- ☐ female
- ☐ inter / trans

E2. What age group do you or your child belong to?

- 0- to 4-year-olds ☐
- 5- to 14-year-olds ☐
- 15- to 24-year-olds ☐
- 25- to 34-year-olds ☐
- 35- to 44-year-olds ☐
- 45 to 54-year-olds ☐
- 55- to 64-year-olds ☐
- 65- to 74-year-olds ☐
- 75 to 100-year-olds ☐

E3. How many years have you or your child been a patient at the dental clinic?

E4. Do you or your child belong to the risk group with regard to a possible COVID-19 infection?

- ☐ Yes
- ☐ No

E5. Why do you or your child belong to the risk group? (Multiple selection possible)

- |                                                                                            |                       |
|--------------------------------------------------------------------------------------------|-----------------------|
| age +50 years                                                                              | <input type="radio"/> |
| chronic disease (e.g. diabetes, high blood pressure, heart, lung, liver or kidney disease) | <input type="radio"/> |
| smoker                                                                                     | <input type="radio"/> |
| immunosuppression                                                                          | <input type="radio"/> |
| overweight                                                                                 | <input type="radio"/> |
| pregnancy                                                                                  | <input type="radio"/> |
| others                                                                                     | <input type="radio"/> |
