# Supplementary material for: Perspectives from Dentists, Dental Assistants, Students, and Patients on Dental Care Adapted to the COVID-19 Pandemic: A Cross-Sectional Survey
Source: Int J Environ Res Public Health. 2021 Apr 9;18(8):3940. doi: 10.3390/ijerph18083940 (PMC8069116; doi:10.3390/ijerph18083940)
Supplement: Supplementary file 1 [file ijerph-18-03940-s001.zip › Questionnaire students.pdf]

A1 I felt sufficiently informed about the dental care concept adapted to COVID-19 pandemic, by...

Please select the appropriate answer for each point:

|                                                                                                                          | strongly<br>disagree  | disagree              | neutral               | agree                 | strongly<br>agree     | no<br>answer          |
|--------------------------------------------------------------------------------------------------------------------------|-----------------------|-----------------------|-----------------------|-----------------------|-----------------------|-----------------------|
| information signs                                                                                                        | <input type="radio"/> |
| internal department information<br>(e.g. meetings, student council,<br>online, personal information<br>transfer meeting) | <input type="radio"/> |
| external department information<br>(e.g. university newsletter,<br>webpage)                                              | <input type="radio"/> |

A2: Please assess whether and to what extent patient care in the dental clinic SINCE the COVID-19 pandemic with regard to the following aspects has changed compared to before the pandemic:

|                                                              | less                  | unchanged             | more                  |
|--------------------------------------------------------------|-----------------------|-----------------------|-----------------------|
| time required for<br>admission/exit (incl.<br>changing room) | <input type="radio"/> | <input type="radio"/> | <input type="radio"/> |
| time required for<br>treatment<br>preparation                | <input type="radio"/> | <input type="radio"/> | <input type="radio"/> |
| waiting time for<br>teachers for tests                       | <input type="radio"/> | <input type="radio"/> | <input type="radio"/> |
| time required for<br>individual<br>treatment sessions        | <input type="radio"/> | <input type="radio"/> | <input type="radio"/> |
| number of patient<br>tasks in treatment<br>classes           |                       |                       |                       |

B1: To what extent do the following statements apply to you about current patient care during the COVID-19 pandemic?

Please select the appropriate answer for each point:

|                                                                                                                                                              | strongly<br>disagree  | disagree              | neutral               | agree                 | strongly<br>agree     | no answer             |
|--------------------------------------------------------------------------------------------------------------------------------------------------------------|-----------------------|-----------------------|-----------------------|-----------------------|-----------------------|-----------------------|
| I think it is good that regular patient treatment is maintained with increased hygiene and protective measures and not only emergency treatment is provided. | <input type="radio"/> |
| I am afraid to infect MYSELF.                                                                                                                                | <input type="radio"/> |
| I am afraid to infect OTHERS.                                                                                                                                | <input type="radio"/> |
| In my opinion, the patients feel uncomfortable.                                                                                                              | <input type="radio"/> |
| I feel uncomfortable.                                                                                                                                        | <input type="radio"/> |

B2. How useful do you think are the following measures with regard to protection against infection in the dental clinic/dental treatment?

|                                                        | strongly<br>disagree  | disagree              | neutral               | agree                 | strongly<br>agree     | no answer             |
|--------------------------------------------------------|-----------------------|-----------------------|-----------------------|-----------------------|-----------------------|-----------------------|
| questionnaire to query symptoms and stay in risk areas | <input type="radio"/> |
| one-way street and entry system                        |                       |                       |                       |                       |                       |                       |
| wearing mouth-to-nose coverings                        | <input type="radio"/> |

throughout the whole  
attendance

Corona test before  
each treatment ☐ ☐ ☐ ☐ ☐ ☐

additional protective  
equipment (visors,  
FFP2 masks etc.) on  
the treatment side ☐ ☐ ☐ ☐ ☐ ☐

structural partitioning  
of the treatment boxes  
(individual "treatment  
rooms) ☐ ☐ ☐ ☐ ☐ ☐

B3. Which of the following aspects affect you?

|                                                                                              | strongly<br>disagree  | disagree              | neutral               | agree                 | strongly<br>agree     | no<br>answer          |
|----------------------------------------------------------------------------------------------|-----------------------|-----------------------|-----------------------|-----------------------|-----------------------|-----------------------|
| limited communication due<br>to additional protective<br>equipment (e.g. visor,<br>mask)     | <input type="radio"/> |
| longer waiting time due to<br>additional measures                                            | <input type="radio"/> |
| lack of facial expression<br>due to additional protective<br>equipment (e.g. visor,<br>mask) | <input type="radio"/> |
| waiting time in the outdoor<br>area of the dental clinic                                     | <input type="radio"/> |
| "traffic jam" at the students'<br>entrance                                                   | <input type="radio"/> |

B4. Were you at least at one time afraid of being infected with COVID-19 at the dental clinic?

- ☐ Yes
- ☐ No

B5. Please indicate for each month how much fear you had of contracting COVID-19 at the dental clinic.

|     | Large<br>fear         | rather<br>fear        | undecided             | rather no<br>fear     | none<br>fear          |
|-----|-----------------------|-----------------------|-----------------------|-----------------------|-----------------------|
| mar | <input type="radio"/> |
| apr | <input type="radio"/> |
| may | <input type="radio"/> |
| jun | <input type="radio"/> |
| jul | <input type="radio"/> |
| aug | <input type="radio"/> |
| sep | <input type="radio"/> |
| oct | <input type="radio"/> |
| nov | <input type="radio"/> |
| dec | <input type="radio"/> |

B4. Do you think, that all hygiene rules related to infection control were followed in the COVID-19 pandemic in the following areas?

|                           | never                 | sometimes             | often                 | more often            | always                |
|---------------------------|-----------------------|-----------------------|-----------------------|-----------------------|-----------------------|
| patient registration      | <input type="radio"/> |
| waiting rooms             | <input type="radio"/> |
| treatment /dentists' room | <input type="radio"/> |

B5. Do you perceive the increased hygiene rules and additional protective measures (e.g., wearing mouth/nose covering in the building, hand hygiene, keeping your distance, regular ventilation) as a burden during your visit to the dentist?

- ☐ Yes, the measures are a burden for me.
- ☐ No, the additional measures are not a problem for me.

C1. For how long (month/s) do you think the COVID-19 pandemic will continue to change our patient care in the dental clinic?

C2. Would you be in favor of maintaining the additional protective measures after the COVID-19 pandemic with regard to other airborne infectious diseases (e.g. tuberculosis)?

|                                                                                                 |                       |
|-------------------------------------------------------------------------------------------------|-----------------------|
| Yes, always.                                                                                    | <input type="radio"/> |
| Yes, depending on the situation (e.g. in the winter months or when there is an increased risk). | <input type="radio"/> |
| I cannot judge.                                                                                 | <input type="radio"/> |
| no                                                                                              | <input type="radio"/> |

C3. What additional hygiene and protective measures would you recommend? (Multiple selection possible)

- questionnaire to query symptoms and stay in risk areas. ☐
- one-way street system and admission system ☐
- wearing of mouth-nose coverings throughout the building ☐
- corona test before each treatment ☐
- additional protective equipment (visors, FFP2/N95 masks, etc.) on the treatment side ☐
- structural partitioning of the treatment boxes into individual "treatment rooms" ☐
- additional hand hygiene ☐
- others ☐

D1. What is your gender?

Please select only one of the following answers:

- ☐ male
- ☐ female
- ☐ inter / trans

D2. What age group do you or your child belong to?

- 15- to 24-year-olds ☐
- 25- to 34-year-olds ☐
- 35- to 44-year-olds ☐
- 45 to 54-year-olds ☐

- 55- to 64-year-olds ☐
- 65- to 74-year-olds ☐
- 75 to 100-year-olds ☐

D3. In which semester are you currently studying??

- 7th semester ☐
- 8th semester ☐
- 9th semester ☐
- 10th semester ☐
- other ☐

D4. Do you belong to the risk group with regard to a possible COVID-19 infection?

- ☐ Yes
- ☐ No

D5. Why do you belong to the risk group? (Multiple selection possible)

- age +50 years ☐
- chronic disease (e.g. diabetes, high blood pressure, heart, lung, liver or kidney disease) ☐
- smoker ☐
- immunosuppression ☐
- overweight ☐
- pregnancy ☐
- others ☐

D6. Have you ever been diagnosed with COVID-19?

- Yes
- No

D7: Where do you think you became infected with COVID-19?

- in private environment (at home) ☐
- in private environment (vacation) ☐
- in professional environment (dental clinic) ☐
- in professional environment (dental praxis) ☐
- in professional environment (medical appointment) ☐
- in professional environment (stay in hospital ) ☐
- others ☐
